# Supplementary material for: A One Health framework for exploring zoonotic interactions demonstrated through a case study
Source: PubMed Central journal article supplement (PMC11250852; doi:10.1038/s41467-024-49967-7), 2024-07-15

Supplementary Information for:

**A One Health framework for exploring zoonotic interactions  
demonstrated through a case study**

Amélie Desvars-Larrive<sup>1,2\*</sup>, Anna Elisabeth Vogl<sup>1</sup>, Gavriela Amadea Puspitarani<sup>1,2</sup>, Liuhuaying Yang<sup>2</sup>,  
Anja Joachim<sup>3</sup>, Annemarie Käsbohrer<sup>1</sup>

<sup>1</sup> Centre for Food Science and Veterinary Public Health, Clinical Department for Farm Animals and Food System Science, University of Veterinary Medicine Vienna, Vienna, Austria

<sup>2</sup> Complexity Science Hub, Vienna, Austria

<sup>3</sup> Centre of Pathobiology, Department of Biological Sciences and Pathobiology, University of Veterinary Medicine Vienna, Vienna, Austria

Correspondence to Amélie Desvars-Larrive ([amelie.desvars@vetmeduni.ac.at](mailto:amelie.desvars@vetmeduni.ac.at))

**This file includes Supplementary Figures 1 to 13 and Supplementary Tables 1 to 8.**

**Supplementary Figure 1: PRISMA flow diagram of publication retrieval and selection.** After screening 2,186 records, we synthesised 246 studies reporting direct or indirect evidence of natural zoonotic infections (or contaminations) in humans, animals, food, and environmental matrices in Austria, 1975-2022.

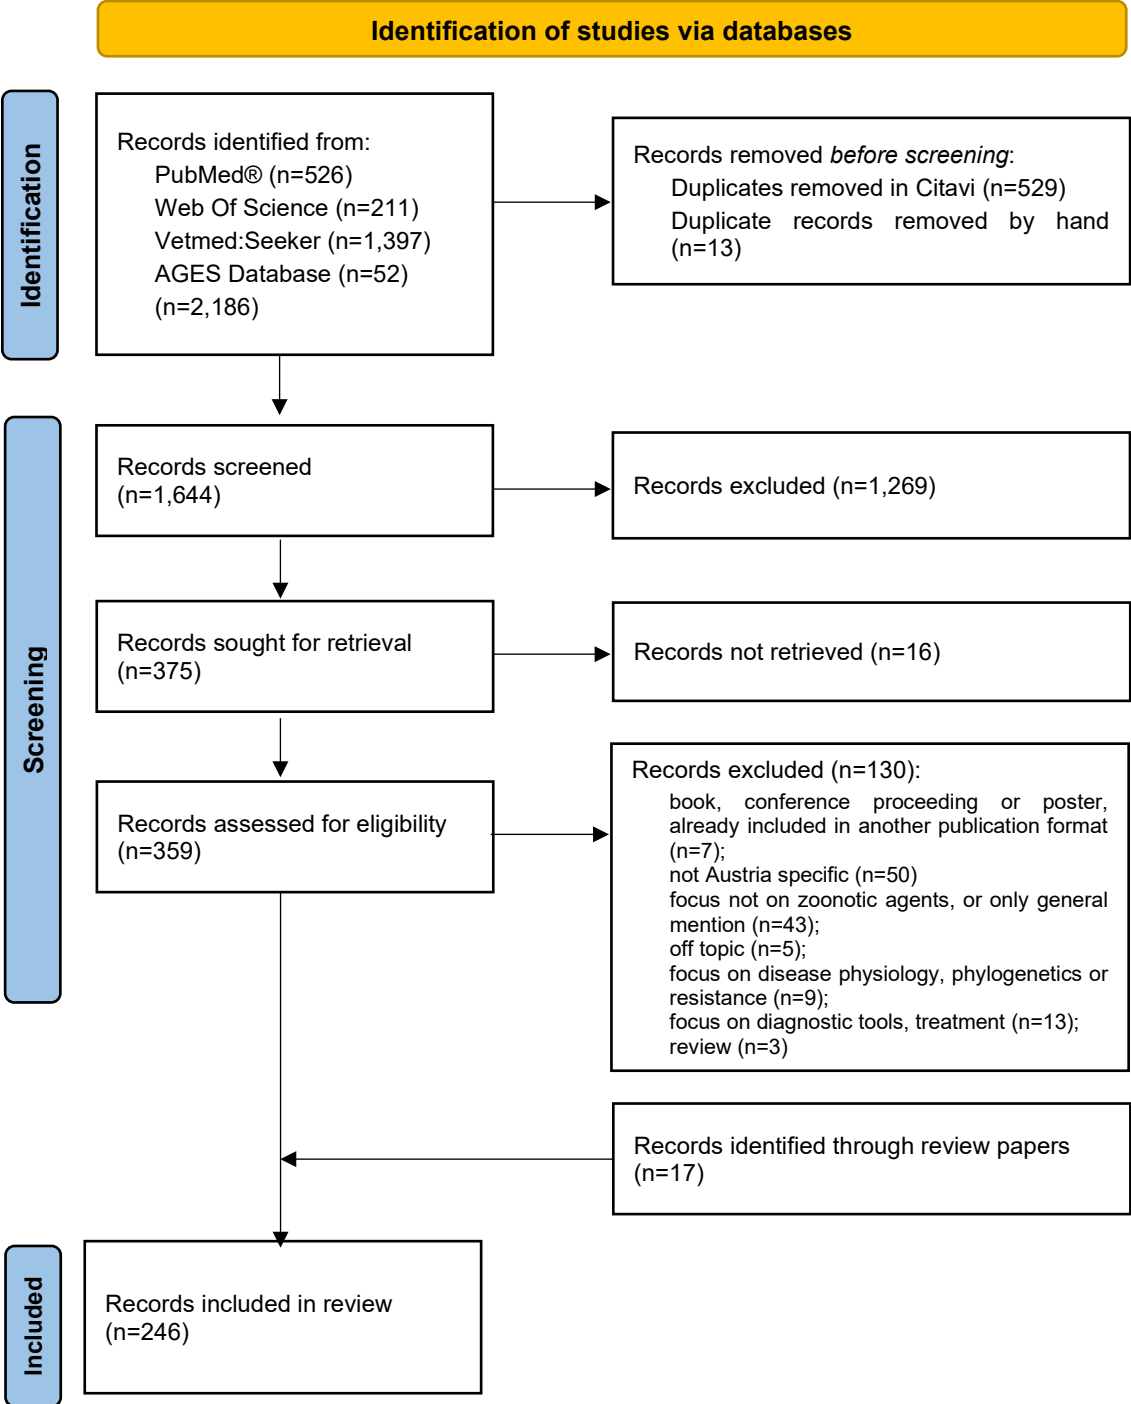

Flow diagram adapted from the template available at: <http://www.prisma-statement.org/PRISMAStatement/FlowDiagram>.

**Supplementary Figure 2: Stacked chart of the annual number of publications that investigated naturally occurring zoonotic agents in Austria between January 1975 and August 2022.** Colours represent the superkingdom to which the zoonotic agents belong.

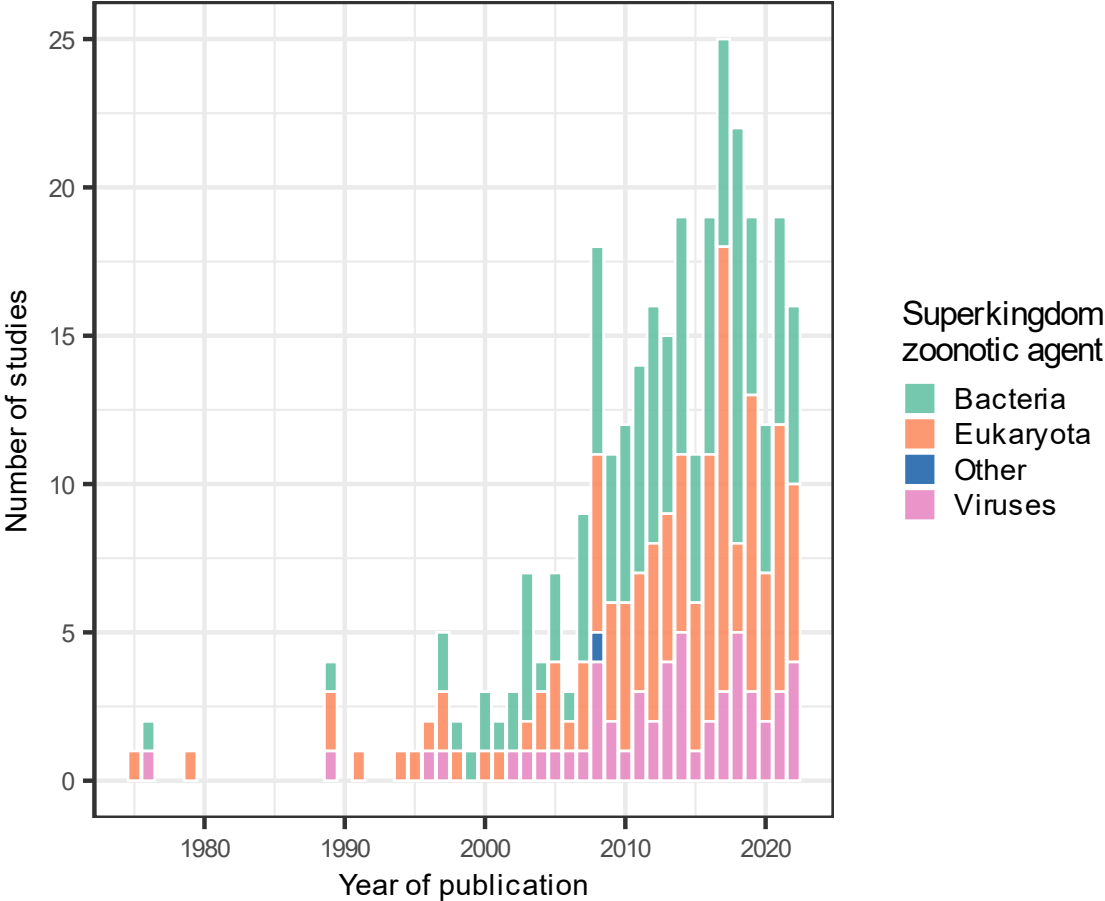

**Supplementary Figure 3: Number of publications per zoonotic agent superkingdom and Austrian federal state, Austria, 1975-2022.**

Studies conducted at a national scale are represented under “Austria”. The percentage of publications per zoonotic agent superkingdom within each federal state is indicated. Publications that did not specify the federal state (e.g., mentioning “eastern Austria”, “west Austria”, “southwestern Austria”, “southeastern Austria”, or “northern limestone alps”) are not represented. One publication may investigate one or more than one zoonotic agent in one or more than one location.

Twenty-three publications (9.4%) explored zoonotic diseases in multiple countries including Austria, often focusing on cross-border research within a European context. Nationwide studies accounted for 11.4% (n=45) of the selected publications. The highest number of publications (n=68, 17.3%) was carried out in Lower Austria, and the lowest number in Carinthia (n=12, 3%). Information about the exact location of the study was missing in 47 publications.

The federal states in the east of Austria (Burgenland, Lower Austria, and Vienna) as well as Styria showed a higher number of publications, compared to western states. This observation may be attributed to the geographical proximity of the Eastern states to Vienna and Mödling (Lower Austria), where the University of Veterinary Medicine and the Austrian Agency for Health and Food Safety (AGES), respectively, have established their laboratory facilities.

The data revealed fluctuating levels of interest in the types of investigated zoonotic agent, depending on the federal state. The highest difference was observed with viral agents; specifically, Vorarlberg exhibited the lowest percentage of publications discussing viral zoonotic agents with 3% of the studies conducted in this federal state addressing viruses. In contrast, 33% of studies conducted in Lower Austria discussed viral zoonotic agents.

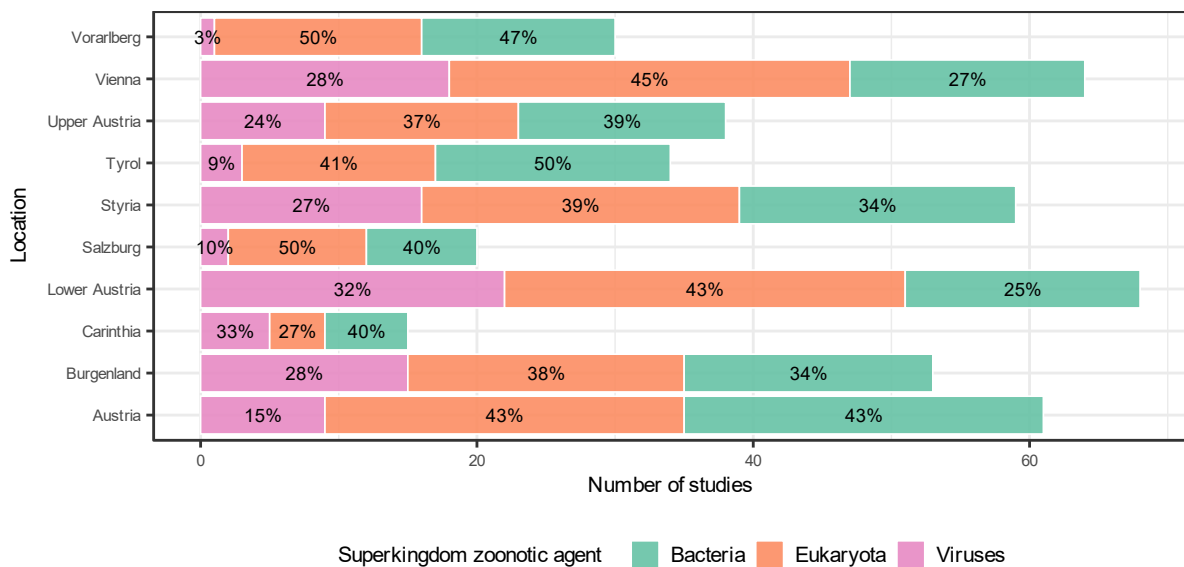

**Supplementary Table 1: Zoonotic agent genera investigated in Austria, 1975-2022, ranked by the number of studies.**

| <b>Genus zoonotic agent</b>    | <b>Number of studies</b> | <b>Percentage of the total number of studies</b> |
|--------------------------------|--------------------------|--------------------------------------------------|
| <i>Salmonella</i>              | 37                       | 5.8                                              |
| <i>Escherichia</i>             | 30                       | 4.7                                              |
| <i>Listeria</i>                | 28                       | 4.4                                              |
| <i>Echinococcus</i>            | 27                       | 4.3                                              |
| Orthoflavivirus                | 26                       | 4.1                                              |
| <i>Brucella</i>                | 25                       | 3.9                                              |
| <i>Toxoplasma</i>              | 24                       | 3.8                                              |
| <i>Campylobacter</i>           | 22                       | 3.5                                              |
| <i>Trichinella</i>             | 22                       | 3.5                                              |
| <i>Leptospira</i>              | 21                       | 3.3                                              |
| <i>Toxocara</i>                | 19                       | 3                                                |
| <i>Rickettsia</i>              | 18                       | 2.8                                              |
| <i>Mycobacterium</i>           | 16                       | 2.5                                              |
| <i>Babesia</i>                 | 15                       | 2.4                                              |
| <i>Coxiella</i>                | 14                       | 2.2                                              |
| <i>Giardia</i>                 | 14                       | 2.2                                              |
| <i>Chlamydia</i>               | 13                       | 2.1                                              |
| <i>Cryptosporidium</i>         | 12                       | 1.9                                              |
| <i>Dirofilaria</i>             | 12                       | 1.9                                              |
| <i>Staphylococcus</i>          | 12                       | 1.9                                              |
| <i>Anaplasma</i>               | 11                       | 1.7                                              |
| <i>Bartonella</i>              | 11                       | 1.7                                              |
| <i>Francisella</i>             | 11                       | 1.7                                              |
| <i>Trichuris</i>               | 10                       | 1.6                                              |
| Alphainfluenzavirus            | 8                        | 1.3                                              |
| <i>Borrelia</i>                | 8                        | 1.3                                              |
| <i>Ascaris</i>                 | 7                        | 1.1                                              |
| Orthohantavirus                | 7                        | 1.1                                              |
| <i>Fasciola</i>                | 6                        | 0.9                                              |
| <i>Leishmania</i>              | 6                        | 0.9                                              |
| Paslahepevirus                 | 6                        | 0.9                                              |
| <i>Encephalitozoon</i>         | 5                        | 0.8                                              |
| <i>Ancylostoma</i>             | 4                        | 0.6                                              |
| <i>Candidatus Neoehrlichia</i> | 4                        | 0.6                                              |
| <i>Capillaria</i>              | 4                        | 0.6                                              |
| <i>Clostridioides</i>          | 4                        | 0.6                                              |

|                        |   |     |
|------------------------|---|-----|
| <i>Dipylidium</i>      | 4 | 0.6 |
| <i>Ehrlichia</i>       | 4 | 0.6 |
| Filarioidea            | 4 | 0.6 |
| Orthopoxvirus          | 4 | 0.6 |
| <i>Trypanosomatida</i> | 4 | 0.6 |
| <i>Uncinaria</i>       | 4 | 0.6 |
| <i>Yersinia</i>        | 4 | 0.6 |
| <i>Alaria</i>          | 3 | 0.5 |
| Anaplasmataceae        | 3 | 0.5 |
| <i>Cardiovirus</i>     | 3 | 0.5 |
| <i>Clostridium</i>     | 3 | 0.5 |
| <i>Enterococcus</i>    | 3 | 0.5 |
| Orthobunyavirus        | 3 | 0.5 |
| <i>Streptococcus</i>   | 3 | 0.5 |
| <i>Taenia</i>          | 3 | 0.5 |
| <i>Toxascaris</i>      | 3 | 0.5 |
| <i>Anisakis</i>        | 2 | 0.3 |
| Aphthovirus            | 2 | 0.3 |
| <i>Baylisascaris</i>   | 2 | 0.3 |
| Borna disease virus    | 2 | 0.3 |
| <i>Borrelia</i>        | 2 | 0.3 |
| Flavivirus             | 2 | 0.3 |
| Lyssavirus             | 2 | 0.3 |
| Mammarenavirus         | 2 | 0.3 |
| <i>Mycoplasma</i>      | 2 | 0.3 |
| <i>Onchocerca</i>      | 2 | 0.3 |
| Parapoxvirus           | 2 | 0.3 |
| <i>Piroplasmida</i>    | 2 | 0.3 |
| <i>Shigella</i>        | 2 | 0.3 |
| <i>Theileria</i>       | 2 | 0.3 |
| Alphamesonivirus       | 1 | 0.2 |
| Alphavirus             | 1 | 0.2 |
| Ancylostomatidae       | 1 | 0.2 |
| <i>Cheyletiella</i>    | 1 | 0.2 |
| Chlamydiaceae          | 1 | 0.2 |
| Chordopoxvirinae       | 1 | 0.2 |
| <i>Cordylobia</i>      | 1 | 0.2 |
| Coronavirus            | 1 | 0.2 |
| <i>Corynebacterium</i> | 1 | 0.2 |

|                          |   |     |
|--------------------------|---|-----|
| <i>Cryptococcus</i>      | 1 | 0.2 |
| <i>Dicrocoelium</i>      | 1 | 0.2 |
| Erbovirus                | 1 | 0.2 |
| Herpesvirus              | 1 | 0.2 |
| <i>Hymenolepis</i>       | 1 | 0.2 |
| <i>Isospora</i>          | 1 | 0.2 |
| <i>Isthmiophora</i>      | 1 | 0.2 |
| Mastadenovirus           | 1 | 0.2 |
| <i>Mesocestoides</i>     | 1 | 0.2 |
| <i>Molineus</i>          | 1 | 0.2 |
| <i>Mycolicibacterium</i> | 1 | 0.2 |
| Orthonairovirus          | 1 | 0.2 |
| Orthopneumovirus         | 1 | 0.2 |
| Parainfluenza virus 4    | 1 | 0.2 |
| Pentastomida             | 1 | 0.2 |
| <i>Proteus</i>           | 1 | 0.2 |
| Rotavirus                | 1 | 0.2 |
| <i>Sarcocystis</i>       | 1 | 0.2 |
| <i>Schistosoma</i>       | 1 | 0.2 |
| <i>Strongyloides</i>     | 1 | 0.2 |
| <i>Thelazia</i>          | 1 | 0.2 |
| <i>Tritrichomonas</i>    | 1 | 0.2 |
| <i>Trueperella</i>       | 1 | 0.2 |

**Supplementary Figure 4: Trend in research interest on zoonotic agents in Austria, 1975-2022, within the environmental compartment, as measured by the number of investigations.** Dots represent the number of investigations per year; solid lines show fitted trend (loess regression); shaded areas represent the corresponding 95% confidence interval.

Figure 1b (Main Manuscript) shows trends in research interest on zoonotic agents in Austria, 1975-2022, for each One Health compartment, as defined in the traditional One Health view. In this analysis, plant-based foodstuffs, invertebrate vectors, and environmental matrices were grouped under the compartment “environment”. Supplementary Figure 4 disaggregates this data, offering a detailed breakdown of the categories within the environmental compartment, enabling a more specific analysis of the observed trend in the number of investigations.

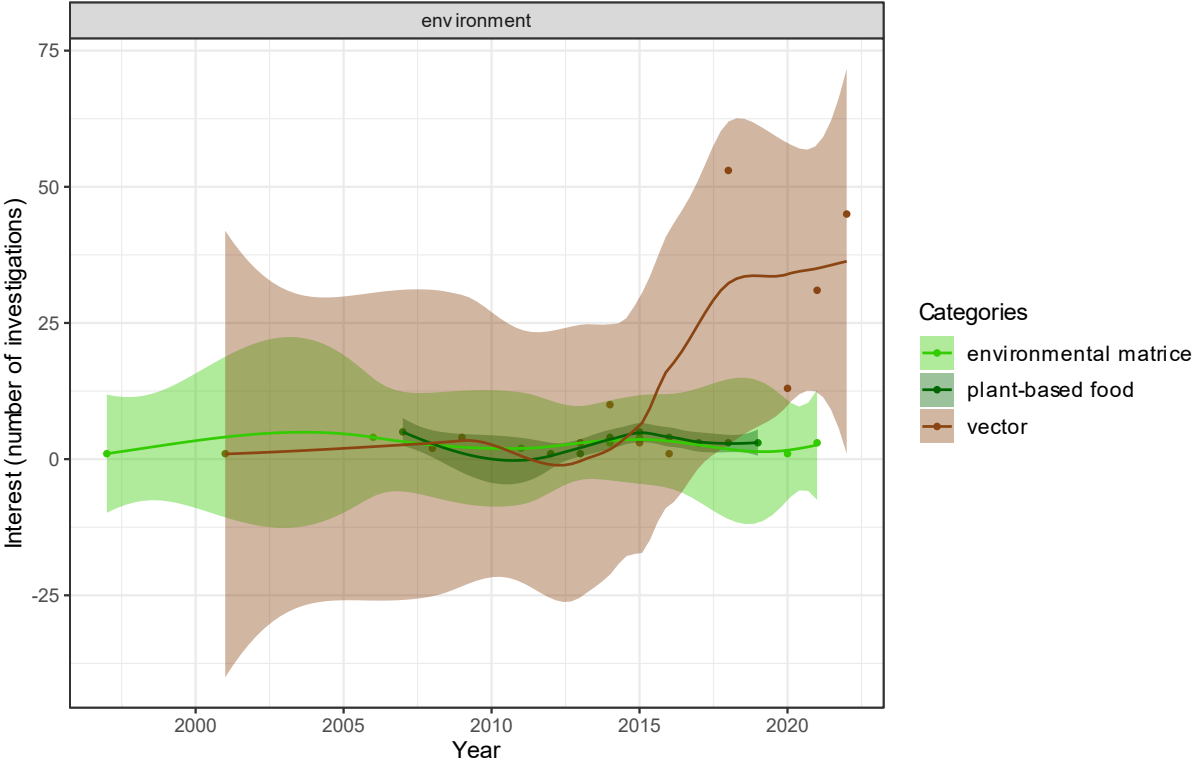





**Supplementary Table 2: Taxonomic class, order, NCBI-resolved scientific and common names, and type of hosts, in which zoonotic agents were directly or indirectly evidenced in Austria between 1975 and 2022.**

Host types are defined as follow: companion animal (defined as domesticated animals possessed by a person for reasons other than food or resource production, including domesticated small rodents or exotic companion animals), livestock (defined as domesticated animal kept for resource and food production), wildlife (defined as free-ranging or captive wild animal species that are not domesticated).

| Host class  | Host order      | NCBI-resolved host scientific name <sup>1</sup> | NCBI-resolved host common name | Host type |
|-------------|-----------------|-------------------------------------------------|--------------------------------|-----------|
| Actinopteri | Salmoniformes   | <i>Salmo trutta fario</i>                       | river trout                    | wildlife  |
| Aves        | Accipitriformes | <i>Accipiter gentilis</i>                       | Northern goshawk               | wildlife  |
| Aves        | Accipitriformes | <i>Accipiter nisus</i>                          | Eurasian sparrowhawk           | wildlife  |
| Aves        | Accipitriformes | <i>Accipitriformes</i>                          | hawks and eagles               | wildlife  |
| Aves        | Accipitriformes | <i>Aegypius monachus</i>                        | Cinereous vulture              | wildlife  |
| Aves        | Accipitriformes | <i>Aquila chrysaetos</i>                        | golden eagle                   | wildlife  |
| Aves        | Accipitriformes | <i>Aquila heliaca</i>                           | eastern imperial eagle         | wildlife  |
| Aves        | Accipitriformes | <i>Aquila nipalensis</i>                        | steppe eagle                   | wildlife  |
| Aves        | Accipitriformes | <i>Buteo buteo</i>                              | common buzzard                 | wildlife  |
| Aves        | Accipitriformes | <i>Circus aeruginosus</i>                       | western marsh harrier          | wildlife  |
| Aves        | Accipitriformes | <i>Gypaetus barbatus</i>                        | lammergeier                    | wildlife  |
| Aves        | Accipitriformes | <i>Haliaeetus albicilla</i>                     | white-tailed eagle             | wildlife  |
| Aves        | Accipitriformes | <i>Neophron percnopterus</i>                    | Egyptian vulture               | wildlife  |
| Aves        | Accipitriformes | <i>Pernis apivorus</i>                          | European honey-buzzard         | wildlife  |
| Aves        | Anseriformes    | <i>Anas</i>                                     | ducks                          | wildlife  |
| Aves        | Anseriformes    | <i>Anas platyrhynchos</i>                       | mallard                        | wildlife  |
| Aves        | Anseriformes    | Anatidae                                        | waterfowl                      | wildlife  |
| Aves        | Anseriformes    | <i>Anser anser</i>                              | domestic goose                 | wildlife  |
| Aves        | Anseriformes    | <i>Anser sp.</i>                                | goose                          | wildlife  |

|      |                 |                              |                        |           |
|------|-----------------|------------------------------|------------------------|-----------|
| Aves | Anseriformes    | Anserinae                    | goose                  | wildlife  |
| Aves | Anseriformes    | <i>Cygnus</i>                | swans                  | wildlife  |
| Aves | Anseriformes    | <i>Cygnus olor</i>           | mute swan              | wildlife  |
| Aves | Apodiformes     | <i>Apus apus</i>             | common swift           | wildlife  |
| Aves | Charadriiformes | Charadriiformes              | shorebirds and others  | wildlife  |
| Aves | Charadriiformes | Laridae                      | gulls                  | wildlife  |
| Aves | Ciconiiformes   | <i>Ciconia ciconia</i>       | white stork            | wildlife  |
| Aves | Ciconiiformes   | <i>Ciconia nigra</i>         | black stork            | wildlife  |
| Aves | Ciconiiformes   | Ciconiiformes                | storks and others      | wildlife  |
| Aves | Columbiformes   | Columbiformes                | pigeons and others     | wildlife  |
| Aves | Columbiformes   | <i>Streptopelia decaocto</i> | Eurasian collared-dove | wildlife  |
| Aves | Coraciiformes   | Coraciiformes                | kingfisher             | wildlife  |
| Aves | Cuculiformes    | Cuculiformes                 | cuckoos and others     | wildlife  |
| Aves | Falconiformes   | <i>Falco</i>                 | falcons                | wildlife  |
| Aves | Falconiformes   | <i>Falco rusticolus</i>      | gyrfalcon              | wildlife  |
| Aves | Falconiformes   | <i>Falco tinnunculus</i>     | common kestrel         | wildlife  |
| Aves | Falconiformes   | Falconiformes                | falcons and others     | wildlife  |
| Aves | Galliformes     | Galliformes                  | landfowls              | wildlife  |
| Aves | Galliformes     | <i>Gallus gallus</i>         | chicken                | livestock |
| Aves | Galliformes     | <i>Meleagris gallopavo</i>   | turkey                 | livestock |
| Aves | Galliformes     | <i>Pavo cristatus</i>        | Indian peafowl         | wildlife  |
| Aves | Galliformes     | Phasianinae                  | Phasianinae            | wildlife  |
| Aves | Galliformes     | <i>Phasianus colchicus</i>   | ring-necked pheasant   | wildlife  |
| Aves | Gruiformes      | <i>Fulica</i>                | coots                  | wildlife  |
| Aves | Gruiformes      | <i>Fulica atra</i>           | Eurasian coot          | wildlife  |

|      |               |                                |                            |          |
|------|---------------|--------------------------------|----------------------------|----------|
| Aves | Gruiformes    | Gruiformes                     | terrestrial and marshbirds | wildlife |
| Aves | Passeriformes | <i>Acrocephalus scirpaceus</i> | Eurasian reed warbler      | wildlife |
| Aves | Passeriformes | <i>Coloeus monedula</i>        | jackdaw                    | wildlife |
| Aves | Passeriformes | <i>Corvus cornix</i>           | hooded crow                | wildlife |
| Aves | Passeriformes | <i>Corvus corone</i>           | carrion crow               | wildlife |
| Aves | Passeriformes | <i>Corvus frugilegus</i>       | rook                       | wildlife |
| Aves | Passeriformes | <i>Curruca communis</i>        | greater whitethroat        | wildlife |
| Aves | Passeriformes | <i>Curruca curruca</i>         | lesser whitethroat         | wildlife |
| Aves | Passeriformes | <i>Cyanistes caeruleus</i>     | blue tit                   | wildlife |
| Aves | Passeriformes | <i>Delichon urbicum</i>        | Northern house-martin      | wildlife |
| Aves | Passeriformes | <i>Emberiza schoeniclus</i>    | reed bunting               | wildlife |
| Aves | Passeriformes | <i>Erithacus rubecula</i>      | European robin             | wildlife |
| Aves | Passeriformes | <i>Garrulus glandarius</i>     | Eurasian jay               | wildlife |
| Aves | Passeriformes | <i>Hirundo rustica</i>         | barn swallow               | wildlife |
| Aves | Passeriformes | <i>Panurus biarmicus</i>       | bearded reedling           | wildlife |
| Aves | Passeriformes | <i>Parus major</i>             | great tit                  | wildlife |
| Aves | Passeriformes | <i>Passer domesticus</i>       | house sparrow              | wildlife |
| Aves | Passeriformes | <i>Passeriformes</i>           | song birds                 | wildlife |
| Aves | Passeriformes | <i>Phoenicurus ochruros</i>    | black redstart             | wildlife |
| Aves | Passeriformes | <i>Pica pica</i>               | Eurasian magpie            | wildlife |
| Aves | Passeriformes | <i>Sitta europaea</i>          | wood nuthatch              | wildlife |
| Aves | Passeriformes | <i>Sylvia atricapilla</i>      | blackcap                   | wildlife |
| Aves | Passeriformes | <i>Sylvia borin</i>            | garden warbler             | wildlife |
| Aves | Passeriformes | <i>Turdus merula</i>           | blackbird                  | wildlife |
| Aves | Passeriformes | <i>Turdus philomelos</i>       | song thrush                | wildlife |

|              |                |                               |                          |                  |
|--------------|----------------|-------------------------------|--------------------------|------------------|
| Aves         | Pelecaniformes | Ardeidae                      | herons                   | wildlife         |
| Aves         | Piciformes     | <i>Dendrocopos major</i>      | great spotted woodpecker | wildlife         |
| Aves         | Piciformes     | Piciformes                    | woodpeckers and others   | wildlife         |
| Aves         | Psittaciformes | <i>Nestor notabilis</i>       | kea                      | wildlife         |
| Aves         | Strigiformes   | <i>Asio otus</i>              | long-eared owl           | wildlife         |
| Aves         | Strigiformes   | <i>Athene noctua</i>          | little owl               | wildlife         |
| Aves         | Strigiformes   | <i>Bubo bubo</i>              | Eurasian eagle-owl       | wildlife         |
| Aves         | Strigiformes   | <i>Bubo scandiacus</i>        | snowy owl                | wildlife         |
| Aves         | Strigiformes   | <i>Strigiformes</i>           | owls                     | wildlife         |
| Aves         | Strigiformes   | <i>Strix aluco</i>            | tawny owl                | wildlife         |
| Aves         | Strigiformes   | <i>Strix nebulosa</i>         | Great grey owl           | wildlife         |
| Aves         | Strigiformes   | <i>Strix uralensis</i>        | Ural owl                 | wildlife         |
| Aves         | Strigiformes   | <i>Tyto alba</i>              | barn owl                 | wildlife         |
| Lepidosauria | Squamata       | <i>Boa constrictor</i>        | boa                      | companion animal |
| Lepidosauria | Squamata       | <i>Brachylophus fasciatus</i> | banded iguana            | companion animal |
| Lepidosauria | Squamata       | <i>Chamaeleo calyptrotus</i>  | veiled chameleon         | companion animal |
| Lepidosauria | Squamata       | <i>Corallus hortulanus</i>    | garden tree boa          | companion animal |
| Lepidosauria | Squamata       | <i>Cyclura cornuta</i>        | rhinoceros iguana        | companion animal |
| Lepidosauria | Squamata       | <i>Cyclura cyclura</i>        | NA                       | companion animal |
| Lepidosauria | Squamata       | <i>Cyclura nubila</i>         | NA                       | companion animal |
| Lepidosauria | Squamata       | <i>Cyclura rileyi</i>         | NA                       | companion animal |
| Lepidosauria | Squamata       | <i>Epicrates cenchria</i>     | NA                       | companion animal |
| Lepidosauria | Squamata       | <i>Furcifer pardalis</i>      | NA                       | companion animal |
| Lepidosauria | Squamata       | <i>Heterodon nasicus</i>      | NA                       | companion animal |
| Lepidosauria | Squamata       | <i>Iguana iguana</i>          | common green iguana      | companion animal |

|              |              |                                            |                        |                  |
|--------------|--------------|--------------------------------------------|------------------------|------------------|
| Lepidosauria | Squamata     | <i>Lampropeltis alterna</i>                | NA                     | companion animal |
| Lepidosauria | Squamata     | <i>Lampropeltis mexicana</i>               | NA                     | companion animal |
| Lepidosauria | Squamata     | <i>Lampropeltis ruthveni</i>               | NA                     | companion animal |
| Lepidosauria | Squamata     | <i>Lampropeltis triangulum campbelli</i>   | NA                     | companion animal |
| Lepidosauria | Squamata     | <i>Lampropeltis triangulum hondurensis</i> | NA                     | companion animal |
| Lepidosauria | Squamata     | <i>Morelia spilota</i>                     | carpet python          | companion animal |
| Lepidosauria | Squamata     | <i>Morelia viridis</i>                     | green tree python      | companion animal |
| Lepidosauria | Squamata     | <i>Phelsuma madagascariensis</i>           | Madagascar day gecko   | companion animal |
| Lepidosauria | Squamata     | <i>Physignathus cocincinus</i>             | NA                     | companion animal |
| Lepidosauria | Squamata     | <i>Pogona vitticeps</i>                    | central bearded dragon | companion animal |
| Lepidosauria | Squamata     | <i>Python molurus</i>                      | Indian rock python     | companion animal |
| Lepidosauria | Squamata     | <i>Python regius</i>                       | NA                     | companion animal |
| Lepidosauria | Squamata     | <i>Sanzinia madagascariensis</i>           | NA                     | companion animal |
| Lepidosauria | Squamata     | <i>Sceloporus malachiticus</i>             | NA                     | companion animal |
| Lepidosauria | Squamata     | Serpentes                                  | snakes                 | companion animal |
| Lepidosauria | Squamata     | <i>Tropidophorus grayi</i>                 | NA                     | companion animal |
| Lepidosauria | NA           | lizard (unspecified)                       | lizard (unspecified)   | companion animal |
| Mammalia     | Artiodactyla | <i>Bos taurus</i>                          | cattle                 | livestock        |
| Mammalia     | Artiodactyla | <i>Capra hircus</i>                        | goat                   | livestock        |
| Mammalia     | Artiodactyla | <i>Capra ibex</i>                          | Alpine ibex            | wildlife         |
| Mammalia     | Artiodactyla | <i>Capreolus capreolus</i>                 | Western roe deer       | wildlife         |
| Mammalia     | Artiodactyla | Cervidae                                   | deer                   | wildlife         |
| Mammalia     | Artiodactyla | <i>Cervus elaphus</i>                      | red deer               | wildlife         |
| Mammalia     | Artiodactyla | <i>Dama dama</i>                           | fallow deer            | wildlife         |
| Mammalia     | Artiodactyla | <i>Lama glama</i>                          | llama                  | livestock        |

|          |                |                                 |                           |                  |
|----------|----------------|---------------------------------|---------------------------|------------------|
| Mammalia | Artiodactyla   | <i>Ovis aries</i>               | sheep                     | livestock        |
| Mammalia | Artiodactyla   | <i>Ovis aries musimon</i>       | mouflon                   | wildlife         |
| Mammalia | Artiodactyla   | <i>Rupicapra rupicapra</i>      | chamois                   | wildlife         |
| Mammalia | Artiodactyla   | <i>Sus scrofa</i>               | pig                       | livestock        |
| Mammalia | Artiodactyla   | <i>Sus scrofa</i>               | pig                       | wildlife         |
| Mammalia | Artiodactyla   | <i>Sus scrofa</i> (w)           | wild boar                 | wildlife         |
| Mammalia | Carnivora      | <i>Canis lupus familiaris</i>   | dog                       | companion animal |
| Mammalia | Carnivora      | <i>Felis catus</i>              | domestic cat              | companion animal |
| Mammalia | Carnivora      | <i>Nyctereutes procyonoides</i> | raccoon dog               | wildlife         |
| Mammalia | Carnivora      | <i>Procyon lotor</i>            | raccoon                   | wildlife         |
| Mammalia | Carnivora      | <i>Vulpes</i>                   | Vulpes                    | wildlife         |
| Mammalia | Carnivora      | <i>Vulpes vulpes</i>            | red fox                   | wildlife         |
| Mammalia | Eulipotyphla   | <i>Erinaceus europaeus</i>      | western European hedgehog | wildlife         |
| Mammalia | Eulipotyphla   | <i>Sorex araneus</i>            | European shrew            | wildlife         |
| Mammalia | Lagomorpha     | <i>Lepus</i>                    | hares                     | wildlife         |
| Mammalia | Lagomorpha     | <i>Lepus europaeus</i>          | European hare             | wildlife         |
| Mammalia | Lagomorpha     | <i>Lepus timidus</i>            | mountain hare             | wildlife         |
| Mammalia | Lagomorpha     | <i>Oryctolagus cuniculus</i>    | rabbit                    | companion animal |
| Mammalia | Perissodactyla | <i>Equus caballus</i>           | horse                     | companion animal |
| Mammalia | Primates       | <i>Homo sapiens</i>             | human                     | human            |
| Mammalia | Primates       | <i>Macaca fuscata</i>           | Japanese macaque          | wildlife         |
| Mammalia | Primates       | <i>Macaca sylvanus</i>          | Barbary ape               | wildlife         |
| Mammalia | Primates       | <i>Pongo pygmaeus</i>           | Bornean orangutan         | wildlife         |
| Mammalia | Rodentia       | <i>Apodemus agrarius</i>        | Eurasian field mouse      | wildlife         |
| Mammalia | Rodentia       | <i>Apodemus flavicollis</i>     | Yellow-necked field mouse | wildlife         |

|             |            |                                 |                                 |                  |
|-------------|------------|---------------------------------|---------------------------------|------------------|
| Mammalia    | Rodentia   | <i>Apodemus sylvaticus</i>      | European woodmouse              | wildlife         |
| Mammalia    | Rodentia   | <i>Arvicola amphibius</i>       | Eurasian water vole             | wildlife         |
| Mammalia    | Rodentia   | <i>Castor fiber</i>             | Eurasian beaver                 | wildlife         |
| Mammalia    | Rodentia   | <i>Marmota marmota</i>          | European marmot                 | wildlife         |
| Mammalia    | Rodentia   | <i>Microtus arvalis</i>         | common vole                     | wildlife         |
| Mammalia    | Rodentia   | <i>Mus musculus</i>             | house mouse                     | wildlife         |
| Mammalia    | Rodentia   | <i>Myodes glareolus</i>         | bank vole                       | wildlife         |
| Mammalia    | Rodentia   | <i>Rattus norvegicus</i>        | Norway rat                      | wildlife         |
| Mammalia    | NA         | new-world camelid (unspecified) | new-world camelid (unspecified) | livestock        |
| Testudinata | Testudines | Testudines                      | turtles                         | companion animal |
| Testudinata | Testudines | Testudinidae                    | tortoises                       | companion animal |
| Testudinata | Testudines | <i>Testudo hermanni</i>         | NA                              | companion animal |

<sup>1</sup> The most specific denomination retrieved from the publication is used when NCBI validation was not possible.



**Supplementary Table 3: Zoonotic agents evidenced in invertebrate vectors, Austria, 1975-2022.**

| NCBI-resolved vector name      | Vector taxonomic order | Vector taxonomic family | NCBI-resolved zoonotic agent name                                                                                                                                                                                                                                                                                                                                                                                                                                                                      |
|--------------------------------|------------------------|-------------------------|--------------------------------------------------------------------------------------------------------------------------------------------------------------------------------------------------------------------------------------------------------------------------------------------------------------------------------------------------------------------------------------------------------------------------------------------------------------------------------------------------------|
| <i>Aedes vexans</i>            | Diptera                | Culicidae               | Tahyna virus                                                                                                                                                                                                                                                                                                                                                                                                                                                                                           |
| <i>Culex</i> <sup>1</sup>      | Diptera                | Culicidae               | Tahyna virus<br>West Nile virus                                                                                                                                                                                                                                                                                                                                                                                                                                                                        |
| <i>Culex pipiens</i>           | Diptera                | Culicidae               | West Nile virus                                                                                                                                                                                                                                                                                                                                                                                                                                                                                        |
| <i>Uranotaenia unguiculata</i> | Diptera                | Culicidae               | Alphamesonivirus 1                                                                                                                                                                                                                                                                                                                                                                                                                                                                                     |
| <i>Dermacentor reticulatus</i> | Ixodida                | Ixodidae                | <i>Bartonella</i> <sup>1</sup><br><i>Francisella tularensis</i><br><i>Rickettsia conorii</i> subsp. <i>raoultii</i><br><i>Rickettsia helvetica</i>                                                                                                                                                                                                                                                                                                                                                     |
| <i>Haemaphysalis concinna</i>  | Ixodida                | Ixodidae                | <i>Bartonella</i> <sup>1</sup>                                                                                                                                                                                                                                                                                                                                                                                                                                                                         |
| <i>Haemaphysalis inermis</i>   | Ixodida                | Ixodidae                | <i>Bartonella</i> <sup>1</sup><br><i>Rickettsia helvetica</i>                                                                                                                                                                                                                                                                                                                                                                                                                                          |
| <i>Hyalomma</i> <sup>1</sup>   | Ixodida                | Ixodidae                | <i>Rickettsia</i> <sup>1</sup>                                                                                                                                                                                                                                                                                                                                                                                                                                                                         |
| <i>Hyalomma marginatum</i>     | Ixodida                | Ixodidae                | <i>Rickettsia aeschlimannii</i>                                                                                                                                                                                                                                                                                                                                                                                                                                                                        |
| <i>Ixodes</i> <sup>1</sup>     | Ixodida                | Ixodidae                | <i>Rickettsia helvetica</i>                                                                                                                                                                                                                                                                                                                                                                                                                                                                            |
| <i>Ixodes ricinus</i>          | Ixodida                | Ixodidae                | <i>Anaplasma phagocytophilum</i><br><i>Babesia divergens</i><br><i>Babesia microti</i><br><i>Babesia sp. venatorum</i><br><i>Bartonella</i> <sup>1</sup><br><i>Borrelia miyamotoi</i><br><i>Borrelia afzelii</i><br><i>Borrelia burgdorferi</i><br><i>Borrelia garinii</i><br><i>Borrelia lusitaniae</i><br><i>Borrelia spielmanii</i><br><i>Borrelia valaisiana</i><br><i>Neorhlichia mikurensis</i><br><i>Rickettsia</i> <sup>1</sup><br><i>Rickettsia helvetica</i><br><i>Rickettsia monacensis</i> |
| <i>Ctenocephalides felis</i>   | Siphonaptera           | Pulicidae               | <i>Bartonella henselae</i><br><i>Rickettsia felis</i>                                                                                                                                                                                                                                                                                                                                                                                                                                                  |

<sup>1</sup> Most specific denomination retrieved from the publication.

**Supplementary Table 4: Zoonotic agents evidenced in environmental matrices, Austria, 1975-2022.**

| Environmental matrix  | NCBI-resolved zoonotic agent name                                                                                                                                                                                                                                   |
|-----------------------|---------------------------------------------------------------------------------------------------------------------------------------------------------------------------------------------------------------------------------------------------------------------|
| Food processing plant | <i>Listeria monocytogenes</i>                                                                                                                                                                                                                                       |
| Meat processing plant | <i>Salmonella</i> <sup>1</sup><br><i>Salmonella enterica</i> subsp. <i>enterica</i> serovar <i>Braenderup</i><br><i>Salmonella enterica</i> subsp. <i>enterica</i> serovar <i>Infantis</i><br><i>Salmonella enterica</i> subsp. <i>enterica</i> serovar Livingstone |
| Public lavatory       | <i>Listeria monocytogenes</i>                                                                                                                                                                                                                                       |
| Sandbox               | <i>Toxocara</i> <sup>1</sup>                                                                                                                                                                                                                                        |
| Slaughter knife       | <i>Escherichia coli</i> EHEC <sup>2</sup><br><i>Escherichia coli</i> EPEC <sup>3</sup>                                                                                                                                                                              |
| Water                 | <i>Cryptosporidium</i> <sup>1</sup><br><i>Giardia</i> <sup>1</sup><br><i>Mycobacterium</i> <sup>1</sup>                                                                                                                                                             |

<sup>1</sup> Most specific denomination retrieved from the publication.

<sup>2</sup> Enterohaemorrhagic *E. coli*.

<sup>3</sup> Enteropathogenic *E. coli*.

**Supplementary Figure 6: Alluvial plot of the zoonotic agents found in food products, Austria, 1975-2022.**

The zoonotic agent’s NCBI-resolved genus is shown on the first axis, the food origin is displayed on the middle axis, and the food category is specified on the right axis. The y-axis represents the number of times an investigation yielded a positive result in the selected publications. The colours highlight the contamination of specific foodstuffs by three zoonotic agent genera, with red: *Salmonella*, purple: *Echinococcus*, and orange: *Trichinella*.

A total of 30 publications investigated food products. These products originated from 23 different food sources, encompassing plant-based food (n=9 publications, 5.6% of the studies investigating food products) and food from animal origin (n=30 studies), such as livestock- and horse-derived food, game-derived food products, and marine products (e.g., herring, mackerel, salmon, trout). Only one publication investigated honey, imported to Austria from Turkey and Egypt. The honey was investigated for *Listeria monocytogenes*, *Salmonella*, *Campylobacter*, and *Escherichia coli*. Results were negative.

The type of food that yielded most positive results were “meat and meat products” (55.8%). In 44.2% of the investigations, the animal origin of the investigated food was unspecified.

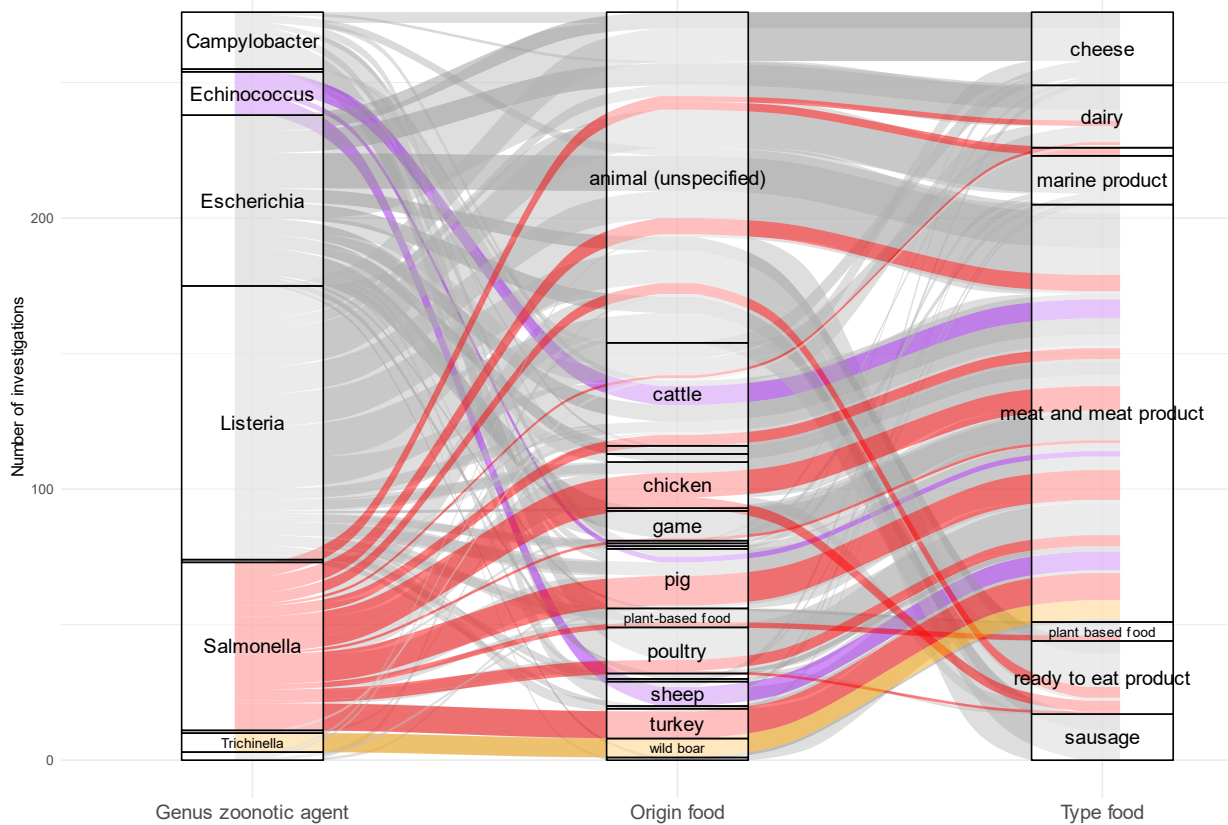



**Supplementary Table 5: Kendall's Tau correlation coefficient of the four node centrality metrics in the scientific research effort-adjusted network of zoonotic agent sharing.** Statistics shown is a two-sided Kendall rank correlation coefficient with adjustments for rank ties. All p-values are < 0.001. The normalised values of the weighted betweenness and closeness were used.

|                        | Degree centrality | Strength | Betweenness centrality | Closeness centrality |
|------------------------|-------------------|----------|------------------------|----------------------|
| Degree centrality      | 1                 | 0.774    | 0.371                  | 0.260                |
| Strength               |                   | 1        | 0.313                  | 0.262                |
| Betweenness centrality |                   |          | 1                      | 0.414                |
| Closeness centrality   |                   |          |                        | 1                    |

**Supplementary Table 6: Pairwise comparisons of the node centrality metrics per category of zoonotic sources using a two-sided Wilcoxon rank sum test.** The table reports the p-values that were adjusted following the Benjamini-Hochberg procedure. A p-value  $\leq 0.05$  was considered significant, indicating a difference between average values of the centrality metrics between two groups of nodes. The Kruskal-Wallis test revealed no difference in the betweenness centrality between the four zoonotic sources.

| <b>Degree centrality</b>    |         |               |                        |
|-----------------------------|---------|---------------|------------------------|
|                             | Vectors | Food matrices | Environmental matrices |
| Hosts                       | 0.013   | 0.150         | 0.013                  |
| Vectors                     |         | 0.025         | 0.667                  |
| Food matrices               |         |               | 0.031                  |
| <b>Strength</b>             |         |               |                        |
| Hosts                       | 0.003   | 0.562         | 0.017                  |
| Vectors                     |         | 0.005         | 0.354                  |
| Food matrices               |         |               | 0.017                  |
| <b>Closeness centrality</b> |         |               |                        |
| Hosts                       | 0.078   | 9.3e-05       | 0.816                  |
| Vectors                     |         | 0.009         | 0.217                  |
| Food matrices               |         |               | 0.025                  |

**Supplementary Table 7: Composition and size of the zoonotic agent sharing communities as detected by the Leiden algorithm.** The community number corresponds to the colour in Figure 4b.

| Community number (size) | Community members (alphabetical order)                                                                                                                                                                                                                                                                                                                                                                                                                                                                                                                                                                                                                                                                                                                                                                                                                                                                                                                                                                                                                                                                                                                                                                          |
|-------------------------|-----------------------------------------------------------------------------------------------------------------------------------------------------------------------------------------------------------------------------------------------------------------------------------------------------------------------------------------------------------------------------------------------------------------------------------------------------------------------------------------------------------------------------------------------------------------------------------------------------------------------------------------------------------------------------------------------------------------------------------------------------------------------------------------------------------------------------------------------------------------------------------------------------------------------------------------------------------------------------------------------------------------------------------------------------------------------------------------------------------------------------------------------------------------------------------------------------------------|
| 1 (n=51)                | <i>Aedes</i> ; <i>Apodemus agrarius</i> ; <i>Apodemus flavicollis</i> ; <i>Apodemus sylvaticus</i> ; <i>Bos taurus</i> ; <i>Canis lupus familiaris</i> ; <i>Capra hircus</i> ; <i>Capra ibex</i> ; <i>Capreolus capreolus</i> ; <i>Castor fiber</i> ; Cervidae ; <i>Cervus elaphus</i> ; <i>Corvus frugilegus</i> ; <i>Ctenocephalides</i> ; <i>Cygnus olor</i> ; <i>Dama dama</i> ; <i>Dermacentor</i> ; <i>Erinaceus europaeus</i> ; <i>Felis catus</i> ; <i>Haemaphysalis</i> ; <i>Homo sapiens</i> ; <i>Hyalomma</i> ; <i>Ixodes</i> ; <i>Lama glama</i> ; <i>Lepus</i> ; <i>Lepus europaeus</i> ; <i>Lepus timidus</i> ; <i>Macaca fuscata</i> ; <i>Macaca sylvanus</i> ; <i>Marmota marmota</i> ; <i>Microtus arvalis</i> ; <i>Mus musculus</i> ; <i>Myodes glareolus</i> ; new-world camelid (unspecified) ; <i>Nyctereutes procyonoides</i> ; <i>Ovis aries</i> ; <i>Ovis aries musimon</i> ; Phasianinae ; <i>Pongo pygmaeus</i> ; <i>Procyon lotor</i> ; <i>Rattus norvegicus</i> ; <i>Rupicapra rupicapra</i> ; sandbox ; sheep meat and meat product ; slaughter knife ; <i>Sorex araneus</i> ; <i>Sus scrofa</i> ; <i>Vulpes</i> ; <i>Vulpes vulpes</i> ; water ; wild boar meat and meat product. |
| 2 (n=33)                | <i>Boa constrictor</i> ; <i>Brachylophus fasciatus</i> ; <i>Chamaeleo calytratus</i> ; <i>Corallus hortulanus</i> ; <i>Cyclura cornuta</i> ; <i>Cyclura cychlura</i> ; <i>Cyclura nubila</i> ; <i>Cyclura rileyi</i> ; <i>Epicrates cenchria</i> ; <i>Furcifer pardalis</i> ; <i>Heterodon nasicus</i> ; <i>Iguana iguana</i> , <i>Lampropeltis alterna</i> ; <i>Lampropeltis mexicana</i> , <i>Lampropeltis ruthveni</i> ; <i>Lampropeltis triangulum campbelli</i> , <i>Lampropeltis triangulum hondurensis</i> , lizard (unspecified) ; <i>Morelia spilota</i> ; <i>Morelia viridis</i> ; <i>Phelsuma madagascariensis</i> , <i>Physignathus cocincinus</i> , <i>Pogona vitticeps</i> , <i>Python molurus</i> , <i>Python regius</i> , <i>Sanzinia madagascariensis</i> ; <i>Sceloporus malachiticus</i> , <i>Serpentes</i> , <i>Sus scrofa</i> (wild boar) ; Testudines ; Testudinidae ; <i>Testudo hermanni</i> ; <i>Tropidophorus grayi</i> .                                                                                                                                                                                                                                                             |
| 3 (n=24)                | Accipitriformes ; <i>Anas</i> ; <i>Anas platyrhynchos</i> ; Anatidae ; <i>Anser</i> sp. ; Anserinae ; <i>Apus apus</i> ; Ardeidae ; Charadriiformes ; Ciconiiformes ; Columbiformes ; Coraciiformes ; Cuculiformes ; <i>Cygnus</i> ; Falconiformes ; <i>Fulica</i> ; <i>Fulica atra</i> ; Galliformes ; <i>Gallus gallus</i> ; Gruiformes ; Laridae ; Passeriformes ; Piciformes ; Strigiformes.                                                                                                                                                                                                                                                                                                                                                                                                                                                                                                                                                                                                                                                                                                                                                                                                                |
| 4 (n=33)                | animal (unspecified) cheese ; animal (unspecified) dairy ; animal (unspecified) egg ; animal (unspecified) marine product ; animal (unspecified) meat and meat product ; animal (unspecified) ready to eat product ; animal (unspecified) sausage ; cattle cheese ; cattle dairy ; cattle meat and meat product ; cattle, pig meat and meat product ; chamois meat and meat product ; chicken meat and meat product ; chicken ready to eat product ; duck meat and meat product ; food processing plant ; game meat and meat product ; goat cheese ; herring marine product ; mackerel marine product ; meat processing plant ; <i>Meleagris gallopavo</i> ; pig meat and meat product ; plant-based food ; poultry meat and meat product ; poultry ready to eat product ; public lavatory ; ruminant meat and meat product ; salmon marine product ; sheep cheese ; trout marine product ; turkey meat and meat product ; wild ungulate meat and meat product.                                                                                                                                                                                                                                                 |
| 5 (n=27)                | <i>Accipiter gentilis</i> ; <i>Accipiter nisus</i> ; <i>Aegypius monachus</i> ; <i>Anser anser</i> ; <i>Aquila chrysaetos</i> ; <i>Aquila heliaca</i> ; <i>Aquila nipalensis</i> ; <i>Asio otus</i> ; <i>Athene noctua</i> ; <i>Bubo scandiacus</i> ; <i>Buteo buteo</i> ; <i>Ciconia ciconia</i> ; <i>Ciconia nigra</i> ; <i>Circus aeruginosus</i> ; <i>Coloeus monedula</i> ; <i>Corvus cornix</i> ; <i>Corvus corone</i> ; <i>Culex</i> , <i>Equus caballus</i> ; <i>Falco</i> , <i>Falco rusticolus</i> , <i>Gypaetus barbatus</i> , <i>Haliaeetus albicilla</i> ; <i>Nestor notabilis</i> ; <i>Pernis apivorus</i> , <i>Pica pica</i> , <i>Strix uralensis</i> .                                                                                                                                                                                                                                                                                                                                                                                                                                                                                                                                          |
| 6 (n=28)                | <i>Acrocephalus scirpaceus</i> ; <i>Bubo bubo</i> ; <i>Curruca communis</i> ; <i>Curruca curruca</i> ; <i>Cyanistes caeruleus</i> ; <i>Delichon urbicum</i> ; <i>Dendrocopos major</i> ; <i>Emberiza schoeniclus</i> ; <i>Erithacus rubecula</i> ; <i>Falco tinnunculus</i> ; <i>Garrulus glandarius</i> ; <i>Hirundo rustica</i> ; <i>Neophron percnopterus</i> , <i>Panurus biarmicus</i> ; <i>Parus major</i> ; <i>Passer domesticus</i> ; <i>Pavo cristatus</i> ; <i>Phasianus colchicus</i> ; <i>Phoenicurus ochruros</i> ; <i>Sitta europaea</i> ; <i>Streptopelia decaocto</i> ; <i>Strix aluco</i> ; <i>Strix nebulosa</i> ; <i>Sylvia atricapilla</i> ; <i>Sylvia borin</i> ; <i>Turdus merula</i> ; <i>Turdus philomelos</i> ; <i>Tyto alba</i> .                                                                                                                                                                                                                                                                                                                                                                                                                                                     |

**Supplementary Figure 8: Heatmap showing the circulating zoonotic agents within each zoonotic source community.** Communities were determined using the Leiden algorithm run on the zoonotic agent sharing network, which edge weights represented the number of zoonotic agents shared, adjusted for the scientific research effort.

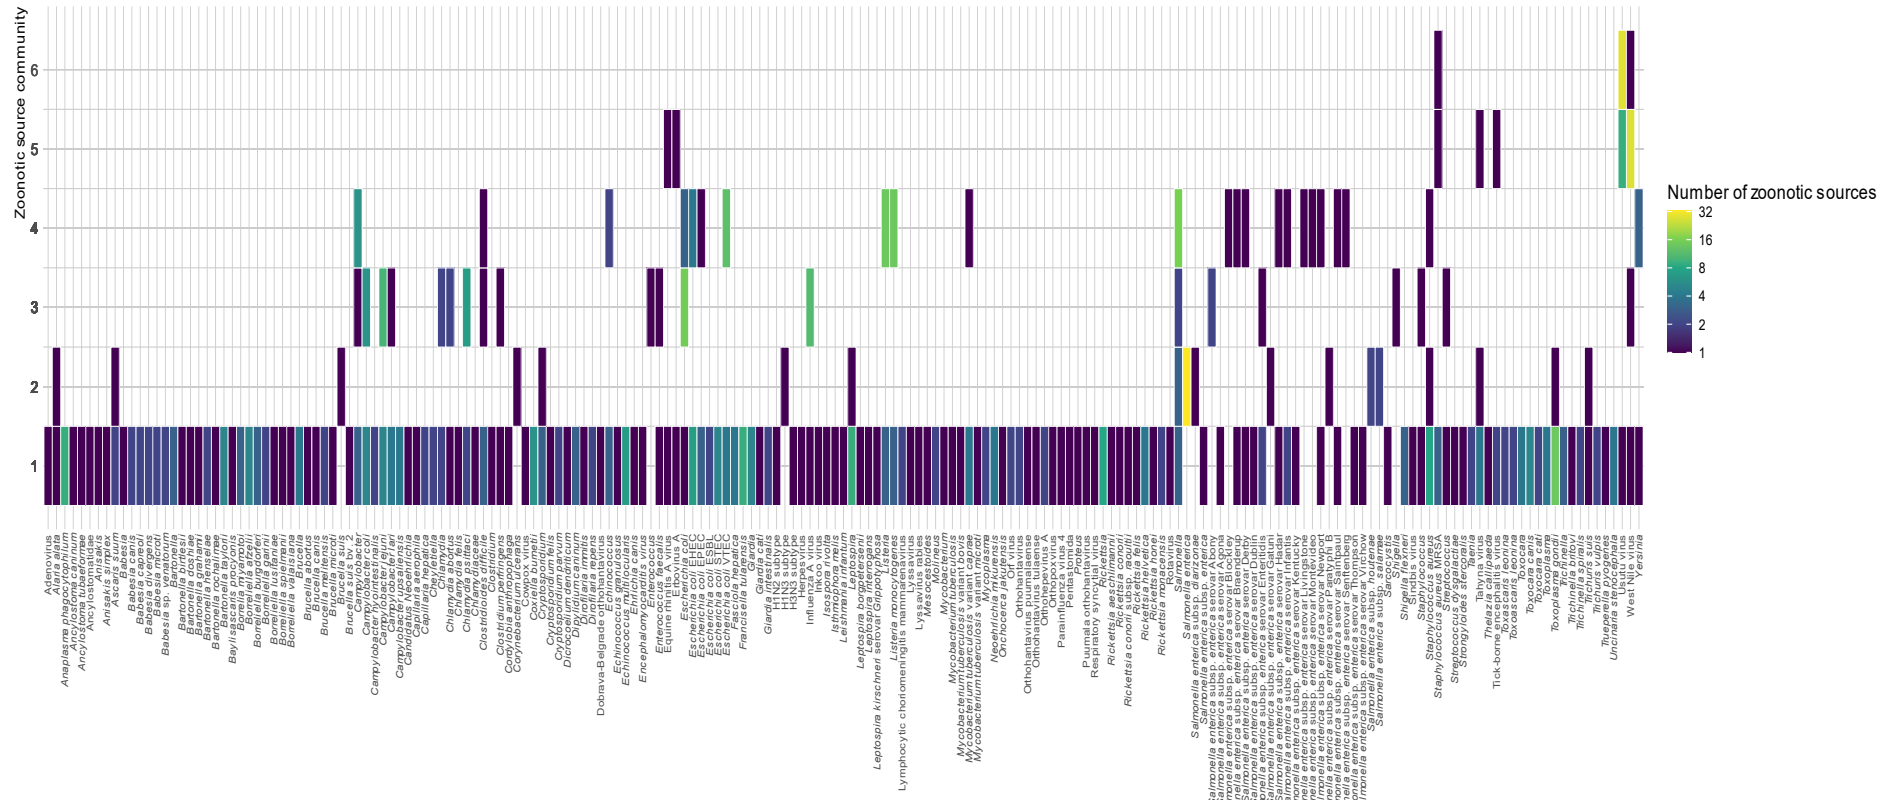

**Supplementary Table 8: Importation events of zoonotic agents documented in Austria, 1975-2022.** The publications underwent screening to identify any references to the potential acquisition of zoonotic agents from sources outside of Austria. Among the selected publications, eleven (4.5%) clearly affirmed that the zoonotic agents were not imported, whereas 14 (5.6 %) either expressed uncertainty about importation or acknowledged the possibility. Importation of zoonotic agents was confirmed in 21 (8.5%) publications, which results are presented in the table below. The table presents the unique combinations of zoonotic agents / probable origin(s) as outlined in the publication. It also indicates the number of times each unique combination was extracted from the selected publications (NA: information not available).

| NCBI-resolved zoonotic agent name         | Suspected country of origin                                           | Number of times importation was evidenced |
|-------------------------------------------|-----------------------------------------------------------------------|-------------------------------------------|
| <i>Anisakis simplex</i>                   | Alaska                                                                | 1                                         |
| <i>Babesia microti</i>                    | USA                                                                   | 1                                         |
| <i>Brucella</i> <sup>1</sup>              | NA                                                                    | 8                                         |
| <i>Brucella melitensis</i>                | NA                                                                    | 2                                         |
| <i>Cordylobia anthropophaga</i>           | Gambia                                                                | 1                                         |
| <i>Dirofilaria immitis</i>                | USA, Spain, Hungary, Greece                                           | 1                                         |
| <i>Dirofilaria repens</i>                 | USA, Spain, Hungary, Greece                                           | 1                                         |
| <i>Echinococcus</i> <sup>1</sup>          | NA                                                                    | 7                                         |
| <i>Ehrlichia canis</i>                    | Greece, Hungary, Spain, Italy, Portugal, France, USA, Asia, Argentina | 1                                         |
| <i>Escherichia coli</i>                   | Ethiopia, Nigeria, South Africa                                       | 1                                         |
| <i>Escherichia coli</i>                   | Turkey, Egypt, China, United Arab Emirates, Russia, other             | 2                                         |
| <i>Escherichia coli</i> VTEC <sup>2</sup> | Turkey, Egypt, China, United Arab Emirates, Russia, other             | 2                                         |
| <i>Leishmania infantum</i>                | Greece, Hungary, Spain, Italy, Portugal, Croatia, Africa, Asia        | 1                                         |
| <i>Leptospira</i> <sup>1</sup>            | South-East Asia, Africa, South America, Central Europe                | 1                                         |
| <i>Listeria monocytogenes</i>             | Mozambique, China, Turkey, United Arab Emirates, Albania,             | 1                                         |
| <i>Listeria monocytogenes</i>             | Turkey, Egypt, China, United Arab Emirates, Russia, other             | 2                                         |
| Lyssavirus <sup>1</sup>                   | Serbia                                                                | 1                                         |
| Pentastomida <sup>1</sup>                 | USA                                                                   | 1                                         |
| <i>Rickettsia aeschlimannii</i>           | NA                                                                    | 1                                         |
| <i>Rickettsia conorii</i>                 | Greece, Spain, Italy, Africa                                          | 1                                         |
| <i>Salmonella</i> <sup>1</sup>            | Ethiopia, Nigeria, South Africa                                       | 1                                         |
| <i>Salmonella</i> <sup>1</sup>            | Turkey, Egypt, China, United Arab Emirates, Russia, other             | 2                                         |
| <i>Trichinella</i> <sup>1</sup>           | Bosnia Herzegovina                                                    | 1                                         |
| <i>Trichinella</i> <sup>1</sup>           | NA                                                                    | 5                                         |
| <i>Trichinella spiralis</i>               | Bosnia                                                                | 1                                         |
| <i>Trichinella spiralis</i>               | Poland                                                                | 1                                         |

<sup>1</sup> Most specific denomination retrieved from the publication.

<sup>2</sup> Verotoxigenic *E. coli*.



Supplementary Figure 9: Timeline of zoonotic agent emergence in Austria, 1975-2022, as reported from the selected publications.

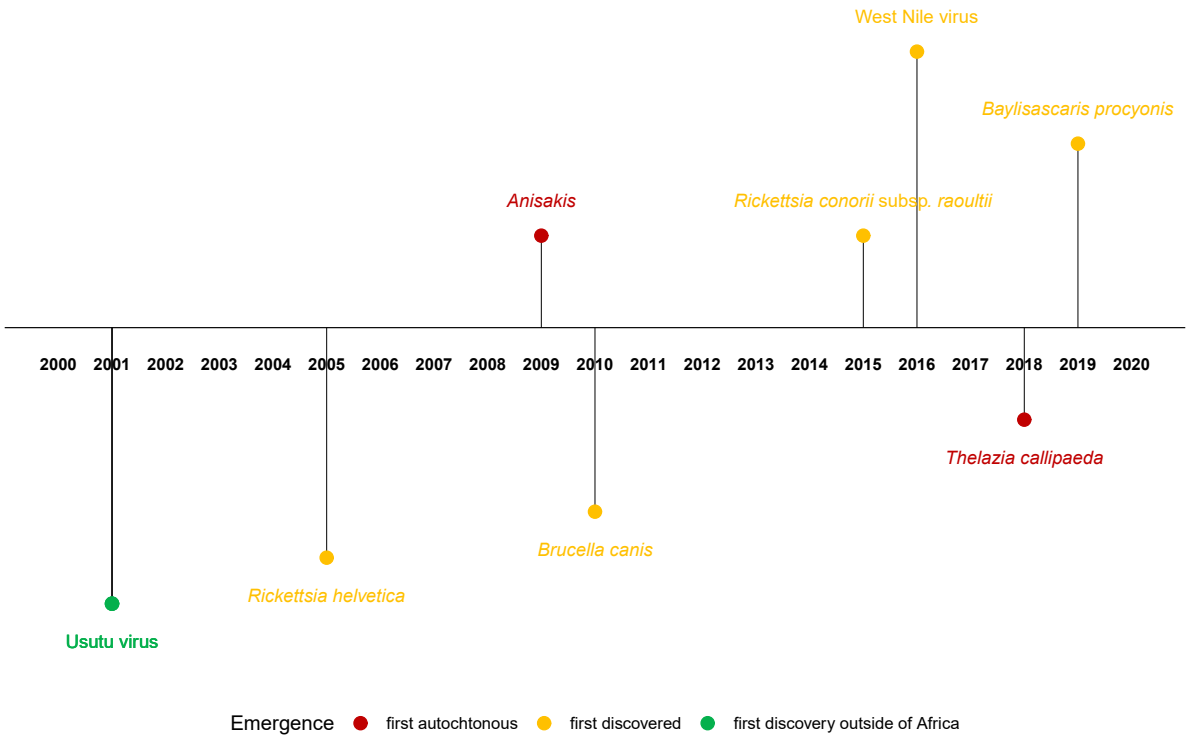

**Supplementary Figure 10: Current source range of the eight zoonotic agents identified as emerging in Austria, 1975-2022.** The subgraph was created by extracting from the zoonotic web the neighbourhood of the nodes representing emerging zoonotic agents (in bold) to the order 1. Node size represents the actor's degree in the original network and is coloured by the category the actor belongs to. Edge width (weight) represents the number of times the zoonotic host-agent association was reported in the selected publication (not adjusted). Zoonotic agents identified as emerging are shown in bold.

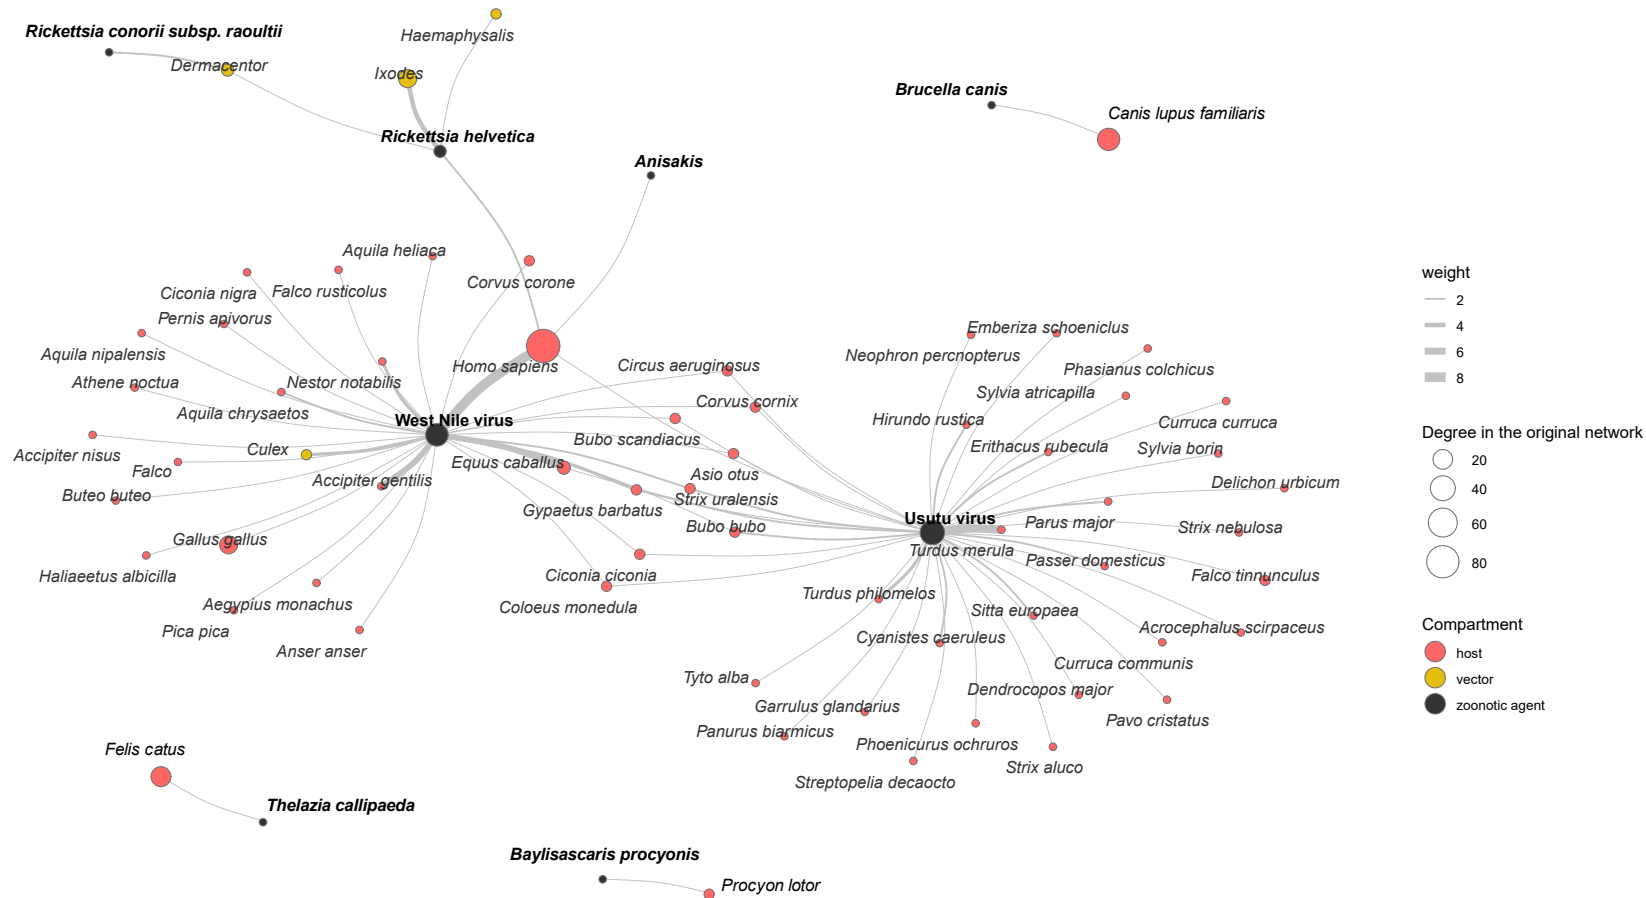

**Supplementary Figure 11: Example of host subsystem (subgraph): subsystem “wild boar”, illustrating a zoonotic source with high betweenness centrality.** The subgraph was created by extracting from the zoonotic web the neighbourhood of the node *Sus scrofa* (w) (in bold), representing the wild boar, to the order 2. Node size represents the actor's degree in the original network and is coloured by the category the actor belongs to. Nodes with degree  $\geq 5$  are labelled. Edge width (weight) represents the number of times the zoonotic host-agent association was reported in the selected publications (not adjusted).

The wild boar (*Sus scrofa*) shares zoonotic agents with two host communities that have limited agent overlap, thereby acting as a bridge host (high betweenness centrality) for *Salmonella enterica* between 1) the community that encompasses human and most domesticated animals and 2) the community predominantly composed of reptiles and amphibians.

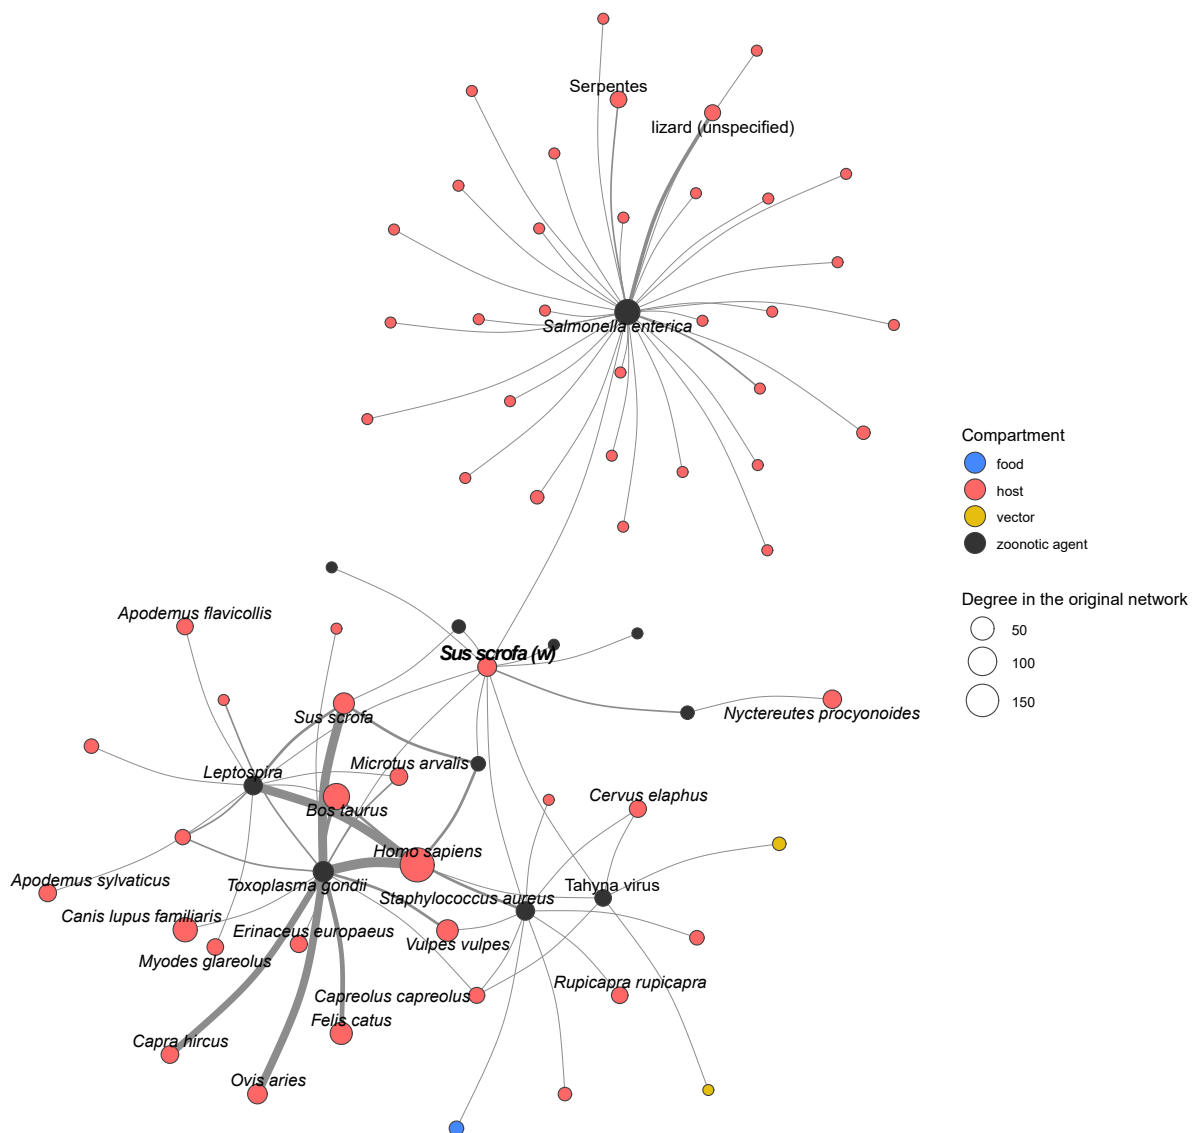

**Supplementary Figure 12: Example of transmission chain: subsystem “*Listeria* sp.”.** The subgraph was created by extracting from the zoonotic web the neighbourhood of the nodes *Listeria* and *Listeria monocytogenes* (both in bold) to the order 1. Node size represents the actor's degree in the original network and is coloured by the category the actor belongs to. Edge width (weight) represents the number of times the zoonotic host-agent association was reported in the selected publications (not adjusted).

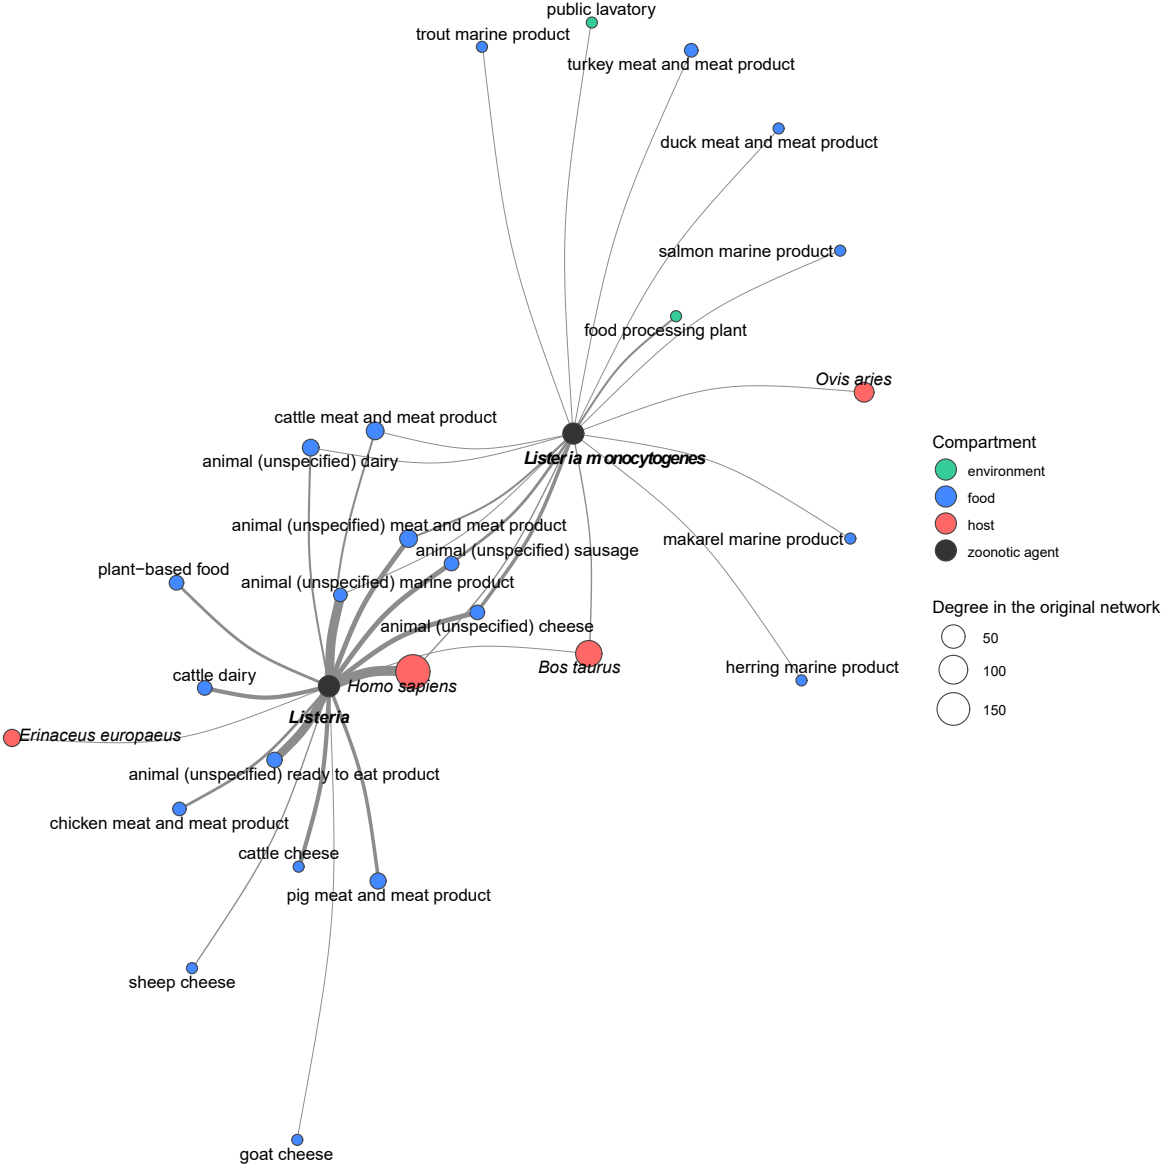

**Supplementary Figure 13: Example of transmission chain: subsystem “shiga toxin-producing *E. coli*”.** The subgraph was created by extracting from the zoonotic web the neighbourhood of the nodes *Escherichia coli* VTEC, *Escherichia coli* EHEC, *Escherichia coli* STEC (in bold) to the order 1. Node size represents the actor’s degree in the original network and is coloured by the category the actor belongs to. Edge width (weight) represent the number of times the zoonotic host-agent association was reported in the selected publications (not adjusted).

Shiga toxin-producing *E. coli* (STEC) strains could refer to both verotoxigenic *E. coli* (VTEC) and enterohaemorrhagic *E. coli* (EHEC) (Kaper, J. B., Nataro, J. P. & Mobley, H. L. Pathogenic *Escherichia coli*. *Nat. Rev. Microbiol.* 2, 123-140 (2004)). In our study, we have chosen a conservative approach to data validation/cleaning and preserved the authors’ terminology.

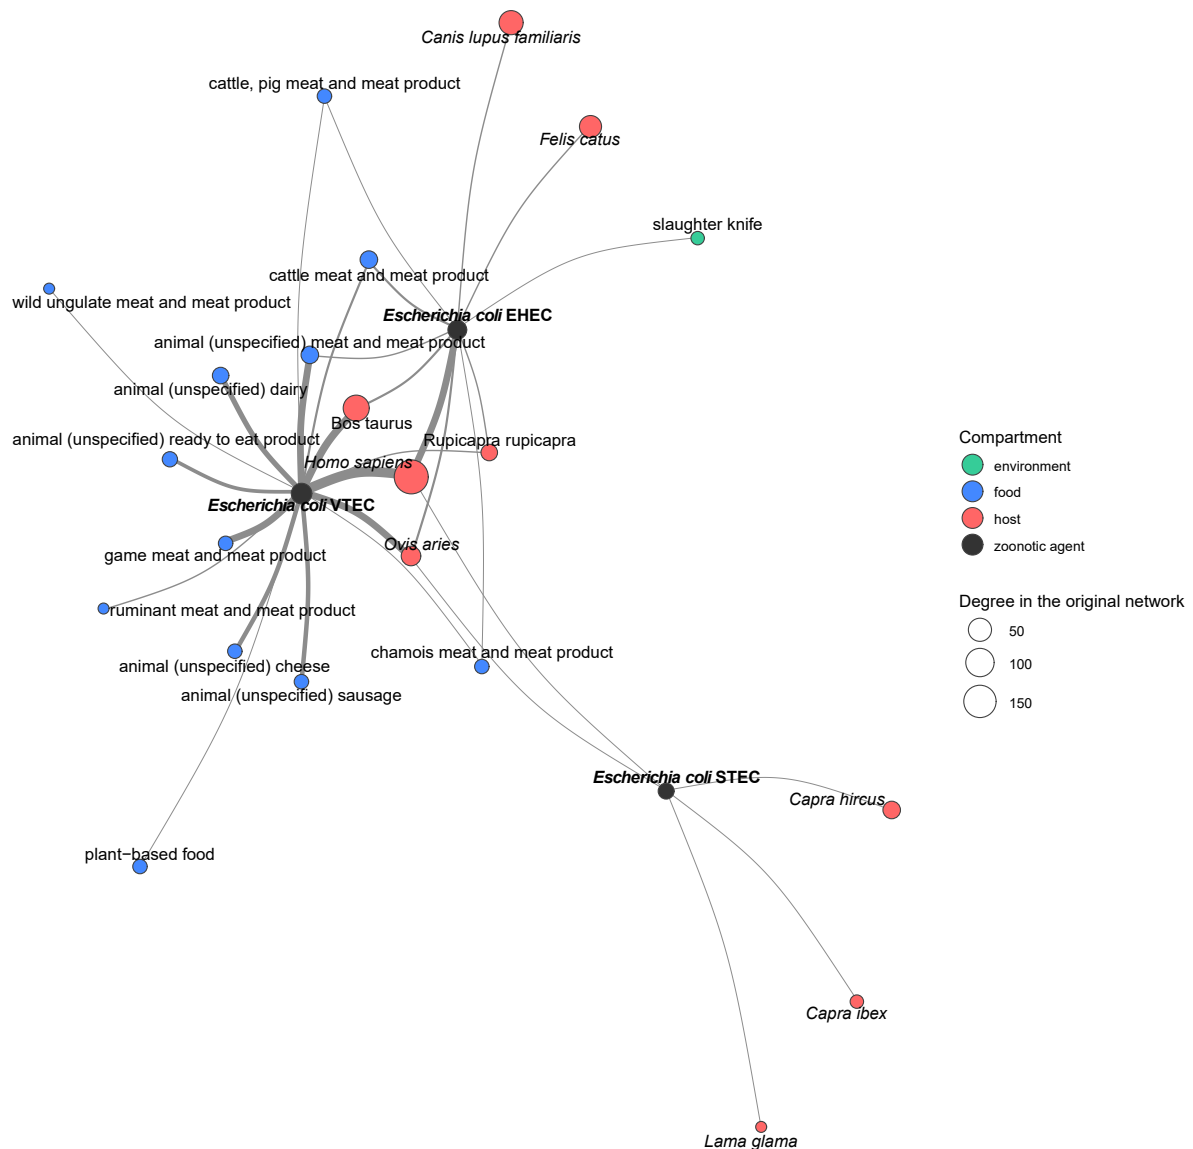

Supplement: 41467_2024_49967_MOESM1_ESM.pdf [file 41467_2024_49967_MOESM1_ESM.pdf]
