# Supplementary material for: A One Health framework for exploring zoonotic interactions demonstrated through a case study
Source: PubMed Central journal article supplement (PMC11250852; doi:10.1038/s41467-024-49967-7), 2024-07-15
Supplement: 41467_2024_49967_MOESM3_ESM.pdf [file 41467_2024_49967_MOESM3_ESM.pdf]

## **Description of Additional Supplementary Files**

File Name: Supplementary Code

Description: ZIP file containing the raw dataset generated in this study, its cleaned and validated version, the documented R scripts used for data cleaning, validation, processing, and analysis, and a READ.ME file, which contains the necessary instructions to run the code and replicate our results.
